# Supplementary material for: Green Tea Consumption and Risk of Breast Cancer and Recurrence—A Systematic Review and Meta-Analysis of Observational Studies
Source: PubMed Central journal article supplement (PMC6316745; doi:10.3390/nu10121886), 2018-12-03
Supplement: nutrients-10-01886-s001.pdf [file nutrients-10-01886-s001.pdf]

**Table S1:** Studies excluded with reason.

| <b>Author and year</b>                                                                                                                                                                                                                                                                                                                                                     | <b>Reason of exclusion</b>                         |
|----------------------------------------------------------------------------------------------------------------------------------------------------------------------------------------------------------------------------------------------------------------------------------------------------------------------------------------------------------------------------|----------------------------------------------------|
| Arthur et al., 2018<br>Ronco et al., 2016<br>Bhoo-Pathy et al., 2015<br>Oh et al., 2015<br>Touvier et al., 2012<br>Fagherazzi et al., 2011<br>Boggs et al., 2010<br>Luo et. al., 2010<br>Luo et al., 2012<br>Pathy et al., 2010<br>Michels et al., 2002<br>Kumar et al., 2009<br>Ganmaa et al., 2008<br>Zheng et al., 1996<br>McLaughlin et al., 1991<br>Wang et al., 2014 | No differentiation between green tea and others    |
| Crew et al., 2012<br>Crew et al., 2015<br>Lazzeroni et al., 2017<br>Samavat et al., 2015<br>Samavat et al., 2017                                                                                                                                                                                                                                                           | No food dietary intake but extract supplementation |
| Chen et al., 2010<br>Stendell-Hollis et al., 2010<br>Zhu et al., 2016                                                                                                                                                                                                                                                                                                      | Different outcome                                  |
| Mayo Clinic, 2008                                                                                                                                                                                                                                                                                                                                                          | Full text not available                            |
| Iwasaki et al., 2010<br>Zhang et al., 2009                                                                                                                                                                                                                                                                                                                                 | Data not available                                 |
